# Supplementary material for: DNA Repair Gene ZmRAD51A Improves Rice and Arabidopsis Resistance to Disease
Source: PubMed Central journal article supplement (PMC6412738; doi:10.3390/ijms20040807), 2019-02-13
Supplement: ijms-20-00807-s001.pdf [file ijms-20-00807-s001.pdf]

# DNA Repair Gene *ZmRAD51A* Improves Rice and Arabidopsis Resistance to Disease

## Supplementary materials

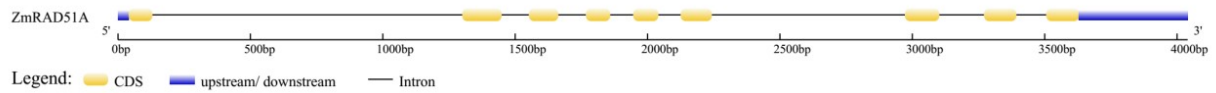

Figure S1. Gene structure of *ZmRAD51A*.

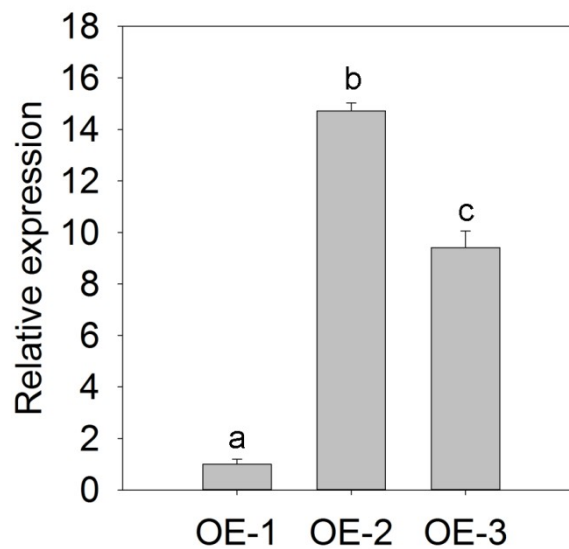

Figure S2. Relative expression levels of *ZmRAD51A* in transgenic rice lines. Different letters above the columns represent significant differences among three lines at  $P < 0.05$ .

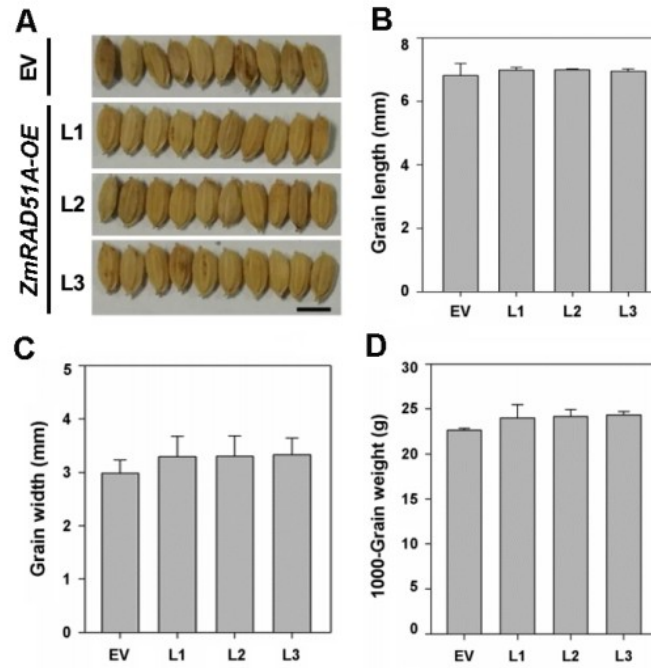

**Figure S3.** Grain phenotypes of *ZmRAD51A-OE* transgenic rice lines. (A) Comparison of grain size between the *ZmRAD51A-OE* and pCAMBIA1301 (EV) transgenic rice lines. (B) Grain lengths of the *ZmRAD51A-OE* and pCAMBIA1301 (EV) transgenic rice lines seeds. (C) Grain width of the *ZmRAD51A-OE* and pCAMBIA1301 (EV) transgenic rice lines seeds. (D) 1000-grain weights of the *ZmRAD51A-OE* and pCAMBIA1301 (EV) transgenic rice lines seeds. Scale bars (A) = 5 mm. Data represent means SD. Three biological replicates were performed.

**Table 1.** Primers used for qRT-PCR in this study.

| Primer names            | Primer sequences        |
|-------------------------|-------------------------|
| <i>RT-AtEDS1-F</i>      | AAGACCAACCCGCTACATA     |
| <i>RT-AtEDS1-R</i>      | TTCAACCTCAGCCAAAAG      |
| <i>RT-AtNDR1-F</i>      | GAAGTCAACGGTGATGGAGT    |
| <i>RT-AtNDR1-R</i>      | AACGAATAGCAAAGAATACGA   |
| <i>RT-AtTAO1-F</i>      | GACCGTTTTTATGATGTGG     |
| <i>RT-AtTAO1-R</i>      | CGAAGTTATCTCCGTCGTAT    |
| <i>RT-AtRPM1-F</i>      | GGTGTTCCTAAAATCTGGC     |
| <i>RT-AtRPM1-R</i>      | TCTAACGGTTCCTCTTCATC    |
| <i>RT-AtUbiquitin-F</i> | CTGCGACTCAGGGAATCTTCTAA |
| <i>RT-AtUbiquitin-R</i> | TTGTGCCATTGAATTGAACCC   |
| <i>RT-OsPAL06-F</i>     | CGTCCGCATCAACACACTCC    |
| <i>RT-OsPAL06-R</i>     | CGTTCACCTTGCTGCCATCT    |
| <i>RT-OsPIKM-F</i>      | TGATGATAAGACATCGGTCAGG  |
| <i>RT-OsPIKM-R</i>      | TCATTTTCAGAAGGCAGAAACG  |
| <i>RT-OsActin-F</i>     | TCCATCTTGGCATCTCTCAG    |
| <i>RT-OsActin-R</i>     | GTACCCGCATCAGGCATCTG    |
| <i>RT-ZmRAD51A-F</i>    | GTGCCAGTCAACTTCATGCG    |
| <i>RT-ZmRAD51A-R</i>    | TTTCCAGAGCGGAATCACC     |
| <i>RT-ZmActin-F</i>     | GGGATTGCCGATCGTATGAG    |
| <i>RT-ZmActin-R</i>     | GAGCCACCGATCCAGACACT    |
